# Supplementary material for: Flexible parameter-sparse global temperature time-profiles thatstabilise at 1.5 °C and 2.0 °C
Source: Copernicus journal article supplement (doi:10.5194/esd-2017-17), 2017-03-02
Supplement: Supplementary file [file esd-2017-17-AC3-supplement.pdf]

# Flexible parameter-sparse global temperature time-profiles that stabilise at 1.5 °C and 2.0 °C

Chris Huntingford<sup>1</sup>, Hui Yang<sup>2,1</sup>, Anna Harper<sup>3</sup>, Peter M. Cox<sup>3</sup>, Nic Gedney<sup>4</sup>, Eleanor J. Burke<sup>5</sup>, Jason A. Lowe<sup>5</sup>, Garry Hayman<sup>1</sup>, Bill J. Collins<sup>6</sup>, Stephen M. Smith<sup>7</sup>, and Ed Comyn-Platt<sup>1</sup>

<sup>1</sup>Centre for Ecology and Hydrology, Benson Lane, Wallingford, Oxfordshire, OX10 8BB, U.K.

<sup>2</sup>Department of Ecology, School of Urban and Environmental Sciences, Peking University, Beijing, P. R. China

<sup>3</sup>College of Engineering and Environmental Science, Laver Building, University of Exeter, North Park Road, Exeter, EX4 4QF, U.K.

<sup>4</sup>Met Office Hadley Centre, Joint Centre for Hydrometeorological Research, Maclean Building, Wallingford, OX10 8BB, U.K.

<sup>5</sup>Met Office, FitzRoy Road, Exeter, Devon, EX1 3PB, U.K.

<sup>6</sup>Department of Meteorology, University of Reading, Earley Gate, PO Box 243, Reading, RG6 6BB, U.K.

<sup>7</sup>Committee on Climate Change, 7 Holbein Place, London, SW1W 8NR, U.K.

*Correspondence to:* Chris Huntingford (chg@ceh.ac.uk)

**Abstract.** The UNFCCC Paris climate meeting of December 2015 committed to holding the rise in global average temperature to well below 2.0 °C above pre-industrial levels. It also committed to pursue efforts to limit warming to 1.5 °C. This leads to two key questions. First, what extent of reductions in emissions will achieve either target? Second, ~~given emissions cuts~~ ~~to achieve the lower target may be especially difficult to achieve, then~~ what is the benefit from reduced climate impacts by keeping warming at or below 1.5 °C? To provide answers climate model simulations need to follow trajectories consistent with these global temperature limits. ~~This implies operating models in an~~ It is useful to operate models in invertible form, to make model-specific estimates of greenhouse gas (GHG) concentration pathways consistent with prescribed temperature profiles. Further inversion derives related emissions pathways for these concentrations. For this to happen, and to enable climate research centres to compare GHG concentrations and emissions estimates, common temperature trajectory scenarios are required. Here we define algebraic curves which asymptote to a stabilised limit, while also matching the magnitude and gradient of recent warming levels. The curves are deliberately parameter-sparse, needing prescription of just two parameters plus the final temperature. Yet despite this simplicity they can allow for temperature overshoot and for generational changes where more effort occurs to decelerate warming change by future generations. The curves capture temperature profiles from the existing rcp2.6 scenario ~~model projections~~ projections by a range of different earth system models (ESMs), which have warming amounts towards the lower levels of those that society is discussing.

## 1 Introduction

The conventional approach to understanding climate change for possible different futures is to force earth system models ~~(ESMs)~~ with either emissions scenarios (e.g., ?) or prescribed future atmospheric greenhouse gas concentrations (e.g., ?).

However recent UNFCCC meetings have placed a focus on prescribed temperature thresholds. This has mainly focused on how to avoid crossing 2.0 °C of global warming since pre-industrial times. However the December 2015 Paris Conference of the Parties (COP21) meeting suggested an additional aspiration of remaining below a 1.5 degrees warming threshold. To achieve the latter could in particular involve major changes of energy ~~use, in either its form or amount~~[demand or production](#) ~~(?)~~, and extensive reliance on ~~carbon-artificial carbon removal (?)~~ [such as biofuels combined with carbon capture and storage](#). Equilibrium temperatures associated with even current GHG concentrations may already correspond to warming levels near to 1.5 °C (?). Therefore given the likely difficulty of fulfilling the 1.5 °C target, there is a focus on understanding what is to be gained climatically from achieving that lower threshold, and the impacts of any temporary overshoot beforehand. There is a related need to calculate the amount of flexibility between different mixtures of greenhouse gas emissions that will achieve the same eventual stabilisation levels. Forward modelling by prescription of emissions or GHG concentrations cannot answer these questions directly, as there is no guarantee that a particular simulation will asymptote precisely to 1.5 °C or 2.0 °C. Instead climate modelling needs to develop inversion methods that follow pre-defined future warming profiles. Existing ESM projections (e.g., from the CMIP5 database, ?) can be scaled to these, for instance by pattern scaling (e.g., ?). Here we move towards that by presenting families of temperature profiles that eventually stabilise. The use of common future warming trajectories may lead to easier discussion and comparison between projects designed to assess a range of implications of either the 1.5 °C or 2.0 °C target.

## 2 Temperature profiles that asymptote to prescribed temperature limits

### 2.1 One-parameter profiles

Derived are profiles of global warming above pre-industrial levels,  $\Delta T(t)$  (°C), dependent on time  $t$  (yr) and with  $t = 0$  as year 2015. Three boundary conditions are satisfied, with two related to present-day warming. One is an estimate of warming between pre-industrial times and year 2015,  $\Delta T_0$  (°C). The second is an estimate of the current rate of global warming,  $\beta = d\Delta T/dt|_{t=0}$  (°C yr<sup>-1</sup>). Values of these two parameters are from the HadCRUT4 dataset (?). We use the median from the 100 HadCRUT4 decadal-smoothed realisations of global temperature rise estimates (see Data Availability below; [HadCRUT4 smoothing is with a 21 point binomial filter applied to annual values](#)). Values in that dataset normalise against the period 1961-1990; we renormalise to the period 1850-1900 as a proxy for pre-industrial times, giving  $\Delta T_0 = 0.89$  °C. For further discussion of this value see ?. The recent gradient in warming is from regression fitting of the last 21 years 1995-2015 inclusive, giving  $\beta = 0.0128$  °C yr<sup>-1</sup>. [We note, though, that when using HadCRUT4 as our observationally-based starting point, then it is necessary to be aware of its non-global spatial extent. Additionally it is compiled with a mix of air and sea surface temperatures, as described in ?.](#) The third boundary condition is final prescribed warming level  $\Delta T_{\text{Lim}}$  (°C), i.e. 1.5 °C or 2.0 °C. This is an eventual stabilisation level which our profiles  $\Delta T$  approach asymptotically. Specification of temperature thresholds in the COP21 statements could have other interpretations, including eventual stabilisation at even lower warming levels, or long-term temperature fluctuations but which remain below prescribed limits. We do allow the possibility of near-term temporary overshoot of  $\Delta T_{\text{Lim}}$ , as described below.

We search for a parameter-sparse family of curves, and consider a path that moves away from a linear temperature rise (via parameter  $\gamma$ ) and towards a stabilisation level. Characterising different curves with an adaptation parameter  $\mu$  ( $\text{yr}^{-1}$ ) leads to:

$$\Delta T = \Delta T_0 + \gamma t - (1 - e^{-\mu t}) [\gamma t - (\Delta T_{\text{Lim}} - \Delta T_0)]. \quad (1)$$

A larger (positive) value for  $\mu$  represents greater societal capability to adjust temperature pathway towards a stable temperature state. The value of  $1/\mu$  (yr) is an approximate e-folding time in moving from a non-zero positive gradient (in time) of global warming, and towards levelling off at  $\Delta T_{\text{Lim}}$ . Taking the time derivative of Eq. (1) (Appendix, Eq. (A2)) and matching to the historical record at year  $t = 0$  gives:

$$\gamma = \beta - \mu (\Delta T_{\text{Lim}} - \Delta T_0). \quad (2)$$

Hence  $\gamma$  is not the current rate of warming, i.e.  $\gamma \neq \beta$ . From Eq. (A4), for  $0 < \mu < 2\beta/(\Delta T_{\text{Lim}} - \Delta T_0)$  this gives  $d^2\Delta T/dt^2|_{t=0} < 0.0$ , corresponding to no acceleration of warming rate in the immediate future. Solutions require  $\mu > 0$  for convergence.

Profiles for different  $\mu$  and for  $\Delta T_{\text{Lim}}$  values of  $2.0^\circ\text{C}$  or  $1.5^\circ\text{C}$  are presented in Fig. 1. For the three values selected, varying behaviours occur. The lower value of  $\mu = 0.0074 \text{ yr}^{-1}$  is sufficiently small that stabilisation can only be achieved after overshoot. The middle value of  $\mu = 0.03 \text{ yr}^{-1}$  achieves stabilisation without overshoot. The value of  $\mu = 0.05 \text{ yr}^{-1}$  also achieves stabilisation without overshoot, but corresponding to the strongest ability by society to adjust temperature, this allows significant initial acceleration and particularly for  $\Delta T_{\text{Lim}} = 2.0^\circ$ .

## 2.2 Two-parameter profiles

Whilst aiming to create profiles that are simple and mathematically tractable, allowing just one parameter may be overly restrictive. For example society might be much more able to reduce emissions (corresponding to high  $\mu$  values) in the further future, but may be less able soon in the near-term. To capture differences in generational approaches to fossil fuel usage, one additional degree-of-freedom is introduced, setting  $\mu(t)$  as a function of time:

$$\mu(t) = \mu_0 + \mu_1 t. \quad (3)$$

Matching the first derivative (Appendix, Eq. (A6)) at year  $t = 0$  gives:

$$\gamma = \beta - \mu_0 (\Delta T_{\text{Lim}} - \Delta T_0). \quad (4)$$

Profiles for different  $\mu_0$  ( $\text{yr}^{-1}$ ) and  $\mu_1$  ( $\text{yr}^{-2}$ ) are presented in Fig. 2. Curves can approach the warming target rapidly, then quickly asymptote to it through an increasingly large value in time of  $\mu$  (e.g. red curve,  $2.0^\circ\text{C}$  target). Similarly increasing  $\mu$  values offer the opportunity to have overshoot occurrences followed by rapid convergence to the desired warming level (e.g. yellow curve,  $1.5^\circ\text{C}$  target).

Figure 3 left panel presents time from year 2015 to achieve stabilisation, defined as within  $0.01^\circ\text{C}$  of target temperature threshold  $2.0^\circ\text{C}$ . Right panel is maximum additional overshoot temperature, should  $\Delta T_{\text{Lim}}$  be crossed. Figure 4 shows the same for  $\Delta T_{\text{Lim}} = 1.5^\circ\text{C}$ . These look-up charts enable selection of balance between general action on moving away from

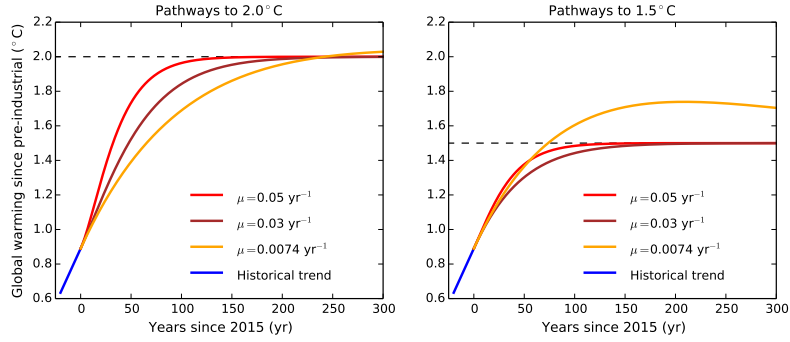

**Figure 1.** The effect of changing  $\mu$  in single-parameter temperature profiles, designed to asymptote to either 2.0°C (left panel) or 1.5°C (right panel). Values of  $\mu$  as given in legend.

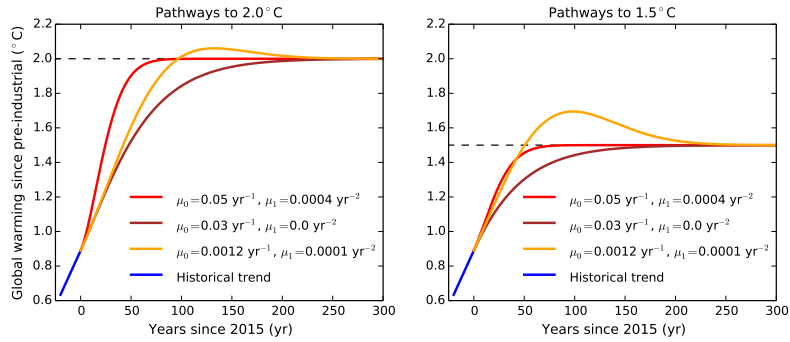

**Figure 2.** The effect of changing  $\mu_0$  and  $\mu_1$  in two-parameter temperature profiles, designed to asymptote to either 2.0°C (left panel) or 1.5°C (right panel). Values of  $\mu_0$  and  $\mu_1$  as given in legend.

business-as-usual approach to emissions (via parameter  $\mu_0$ ) and leaving more change to future generations (via parameter  $\mu_1$ ). Lower  $\mu_0$  and  $\mu_1$  values take longer to reach stabilisation levels, although they risk temporary overshoot of the temperature target. Gray shading in right panels of Figs. 3 and 4 is where overshoot happens, and temperature is rising throughout the 500-year period, and so peak warming occurs after that time. Overshoot is considered present if any year has a temperature

5 exceeding 0.01 °C above target level. By definition, solutions of  $\mu_0 < 0.0$  and  $\mu_1 = 0$  never converge.

One potential evolution of global temperature could be a rapid rise to 2.0 °C of global warming, followed by strong efforts to reduce quickly to stabilisation at 1.5 °C. To achieve this at single century timescale, with the curve structure of Eqs. (1), (3) and  $\Delta T_{\text{Lim}} = 1.5^\circ\text{C}$ , requires  $\mu_0$  to be slightly negative, combined with high values of  $\mu_1$ . This influences selecting ranges  $\mu_0$  and  $\mu_1$  in Fig. 4.

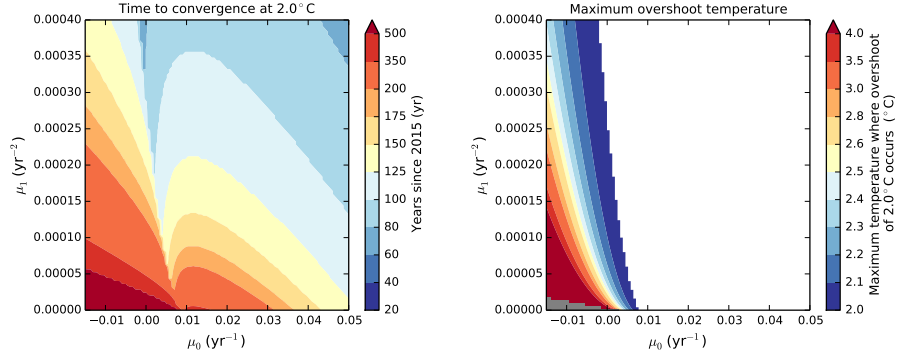

**Figure 3.** The dependence of time to stabilisation and any overshoot magnitude (where present, white space otherwise) on parameters  $\mu_0$  and  $\mu_1$  in temperature profiles, and with  $\Delta T_{\text{Lim}}=2.0^\circ\text{C}$ . The scale of colourbar is nonlinear. The gray region at the bottom left side of the right-hand panel is where temperatures become higher than target  $2.0^\circ\text{C}$  and are increasing through all 500 years so peak warming not attained in that time.

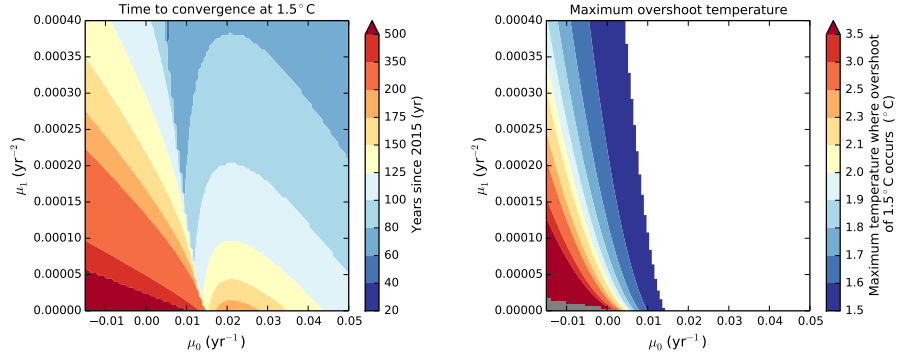

**Figure 4.** The dependence of time to stabilisation and any overshoot magnitude (where present, white space otherwise) on parameters  $\mu_0$  and  $\mu_1$  in temperature profiles, and with  $\Delta T_{\text{Lim}}=1.5^\circ\text{C}$ . The scale of colourbar is nonlinear. The gray region at the bottom left side of the right-hand panel is where temperatures ~~becom~~become higher than target  $1.5^\circ\text{C}$  and are increasing through all 500 years so peak warming not attained in that time.

### 2.3 Fitting to existing ESM simulations

Equations (1), (3) and (4) generate a range of future temperature pathways towards prescribed warming limits. For these, related changes in atmospheric gas concentrations and emissions can be determined. However many ESMs have been operated in forward mode, forced with scenarios of atmospheric greenhouse gas concentrations that correspond to heavy mitigation of fossil fuel burning. The rcv2.6 scenario (?) gives ESM-based estimates of stabilisation of global warming around  $2.0^\circ\text{C}$  warming since pre-industrial times. We fit our model to these ESM projections under rcv2.6 scenario. Parameters  $\beta$  and  $\Delta T_0$  are tuned to their projections of temperature for years 1995 to 2015 inclusive, whilst  $\Delta T_{\text{Lim}}$ ,  $\mu_0$  and  $\mu_1$  are fitted to years 2016

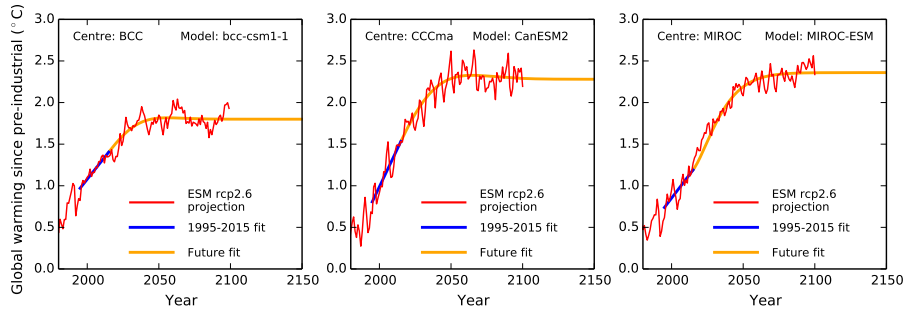

**Figure 5.** Fit of Eq. (1) (orange curves) for years after 2015, and to three representative ESM simulations (red curves) that correspond to the rcp2.6 scenario of atmospheric gas changes. Blue curve is the linear fit to the ESM for period 1995-2015. Annotated in each panel is modelling centre and ESM name. Fit to all rcp2.6 simulations is given in Fig. A1.

to 2100. Figure 5 shows this curve calibration against three representative ESM rcp2.6 projections, expanded to a full set of 25 ESMs in Fig. A1. Across years 2016 to 2100 and for each individual ESM, the standard deviation root mean square error (RMSE) of the differences between fit and ESM simulation is calculated. The mean of these standard deviations RMSE values is 0.11 °C. This value is similar to the standard deviation of RMSE of differences between measurement and model estimates of global temperature interannual variability after detrending (e.g. Table 1b of ?). This confirms our curves can reproduce rcp2.6 high mitigation ESM projections. Otherwise any systematic differences would cause standard RMSE deviations higher than those of the interannual variability only, and where the latter is not represented in our profiles.

We additionally fit our curves to pathways in which emissions are generated using integrated assessment models (IAM), and related global temperature profiles created using a simple climate model. This is for warming profiles from the IPCC scenario database (<https://tntcat.iiasa.ac.at/AR5DB/>) and for the marker scenarios of the more recent shared socioeconomic pathways (SSP) database (<https://tntcat.iiasa.ac.at/SspDb>). We demonstrate that the functional forms used here can also be fitted to these IAM-based scenarios to a good level of accuracy (see Supplementary Information).

## 2.4 Accounting for uncertainty in warming rates

The relatively low rate of warming increase since year 1998 has been the subject of debate, and is sometimes referred to as the “warming hiatus”. The possibility of this occurring has been assessed in detail (e.g., ?). If a natural decadal-timescale fluctuation has temporarily suppressed background warming trend, then our HadCRUT-based warming rate  $\beta$  could be too small. The MAGICC climate impacts model, parameterised against a range of ESMs, typically projects recent warming as around  $\beta = 0.025 \text{ °C yr}^{-1}$ . As a sensitivity study, we reproduce Fig. 3 and Fig. 4 with that higher warming rate, and as Fig. A2 and Fig. A3 respectively.

## 2.5 Applications

Our profiles enable a common framework for discussion of warming ~~profiles-trajectories~~ that stabilise to pre-defined temperature limits. Regional climate change corresponding to these global temperatures can be estimated from interpolation of ESM projections (e.g. by pattern-scaling, ?). ~~These scaling methods~~ Such scaling techniques can be linked to impacts models (e.g.,

5 ?). In the comprehensive review of methods to identify regional differences associated with alternative global warming targets, ? note pattern-scaling as a key technique. The accuracy of this interpolation system has been recently reviewed in detail by ? and with enhancements proposed by ? . In the other approaches of ? , the central issue remains as how to interpret existing simulations, that even for identical forcings, project a range of different future final warming levels.

Emissions profiles can be calculated to ~~fulfil-fulfil~~ the ESM-dependent radiative forcings associated with any prescribed  
10 global temperature stabilisation profile. These can include different mixtures of individual greenhouse gas emissions, whilst accounting for any perturbed land-atmosphere and ocean-atmosphere gas exchanges. The sum of the radiation changes for altered individual atmospheric greenhouse gas combinations must equal the ESM-dependent radiative forcing. Although our analytical forms are generic and can be calculated for any prescribed final stabilised temperature  $\Delta T_{\text{Lim}}$ , the emphasis here is placed on the 1.5 °C or 2.0 °C targets. This is due to their strong current discussion in policy circles regarding “clean energy”  
15 (e.g. ?).

To understand the significance between stabilizing global warming at either 1.5°C or 2.0° is a complex and multi-dimensional problem. There are implications for regional climate changes, impacts and for “allowable” emissions and including the range of potential mixes between emitted greenhouse gases. These factors will also depend on the time evolution of global warming towards such warming thresholds. Each of these issues requires study, and ideally in a way that enables findings to be compared  
20 in a common framework. The application of these curves is to work towards such a framework, by offering a set of possible future warming pathways for utility in research initiatives, and that can be readily defined through a limited set of parameters.

## 3 Conclusions

Presented are parameter-sparse algebraic curves that match contemporary levels and rate of change of global mean temperature, and asymptote to prescribed warming thresholds. These represent a smooth transition from current rates of warming through  
25 to stabilised temperature levels. They can include an initial overshoot of temperatures above any desired final warming level. Their relative simplicity makes them transparent, and ~~potentially more open to scrutiny and discussion. Common temperature scenarios open to discussion.~~ If common temperature scenarios are adopted by a range of studies (by selection of  $\mu_0$ ,  $\mu_1$  and  $\Delta T_{\text{Lim}}$  values), this may allow easier comparison ~~if used for a range of studies to understand either of either the~~ impacts of, or emissions to achieve, 1.5 °C or 2.0 °C warming stabilisation. At this stage, we do not associate any particular parameter  
30 combinations (or ranges) with their feasibility of fulfilment by society.

The curves have five parameters, with three of these constrained by: current warming level  $\Delta T_0$ , current rate of warming change  $\beta$  and final stabilised state  $\Delta T_{\text{Lim}}$ . The remaining two parameters  $\mu_0$  and  $\mu_1$ , offering two degrees of freedom, gives flexibility of pathway shape before asymptoting to temperature  $\Delta T_{\text{Lim}}$ . Our curves allow for the possibility of temporary

overshoot. This enables characterisation of the illustrative scenarios proposed in (Fig. 4 of ?), and their metric of dangerous anthropogenic interference (DAI) defined as integrated time and magnitude spent overshooting a safe upper limit. Where an impacts study is for a period ahead that is much less than the time to stabilisation, then these curves allow for the possibility of gradually rising or declining temperatures through any analysis period.

- 5 Some very specific pathways may require further versatility. For instance defining a pathway asymptoting to 1.5 °C and allowing warming overshoot to 2.0 °C constrains one degree of freedom. If the difference between speed of approaching 2.0°C is specified as either much quicker or much slower than time from that peak to 1.5°C, then two more degrees of freedom are required giving three in total. To satisfy situations such as this then further curve forms could, for instance, include specification of  $\mu$  as a quadratic in time.

## 10 4 Code availability

The python scripts leading to any of the diagrams is available on request to Chris Huntingford (chg@ceh.ac.uk)

## 5 Data availability

- Global warming amount to present day, along with estimates of its gradient comes from the HadCRUT dataset. In particular the global annual anomalies are used from the median of the 100 member ensemble. These values are column 2 (column 1 is  
15 date) of: [http://www.metoffice.gov.uk/hadobs/hadcrut4/data/current/time\\_series/HadCRUT.4.5.0.0.annual\\_ns\\_avg\\_smooth.txt](http://www.metoffice.gov.uk/hadobs/hadcrut4/data/current/time_series/HadCRUT.4.5.0.0.annual_ns_avg_smooth.txt)

## Appendix A: First and Second derivatives

Here we present the first and second derivatives for the one- and two-parameter profiles.

### A1 One-parameter profiles

The first derivative of Eq. (1) satisfies:

$$20 \quad \frac{d\Delta T}{dt} = \gamma - (1 - e^{-\mu t}) [\gamma] - [-e^{-\mu t} \times (-\mu)] [\gamma t - (\Delta T_{\text{Lim}} - \Delta T_0)] \quad (\text{A1})$$

which at  $t = 0$  gives:

$$\frac{d\Delta T}{dt}|_{t=0} = \beta = \gamma + \mu(\Delta T_{\text{Lim}} - \Delta T_0). \quad (\text{A2})$$

The second derivative of Eq. (1) is found by differentiating Eq. (A1) with respect to  $t$ , giving:

$$\begin{aligned} \frac{d^2\Delta T}{dt^2} &= -(-e^{-\mu t} \times -\mu) [\gamma] - [-e^{-\mu t} \times -\mu] [\gamma] - [-e^{-\mu t} \times (-\mu) \times (-\mu)] \times [\gamma t - (\Delta T_{\text{Lim}} - \Delta T_0)] \\ 25 \quad &= -2\mu\gamma e^{-\mu t} + \mu^2 e^{-\mu t} [\gamma t - (\Delta T_{\text{Lim}} - \Delta T_0)] \end{aligned}$$



and which at time  $t = 0$  gives:

$$\frac{d^2 \Delta T}{dt^2} \Big|_{t=0} = -2\mu\gamma - \mu^2(\Delta T_{\text{Lim}} - \Delta T_0). \quad (\text{A3})$$

Substitution of condition (2) in to Eq. (A3) gives:

$$\frac{d^2 \Delta T}{dt^2} \Big|_{t=0} = -2\mu\beta + \mu^2(\Delta T_{\text{Lim}} - \Delta T_0). \quad (\text{A4})$$

## 5 A2 Two-parameter profiles

The first derivative of Eq. (1) with time-dependent  $\mu$  as given in Eq. (3) satisfies:

$$\frac{d\Delta T}{dt} = \gamma - \left(1 - e^{-(\mu_0 + \mu_1 t)t}\right) [\gamma] - \left[-e^{-(\mu_0 + \mu_1 t)t} \times (-\mu_0 - 2\mu_1 t)\right] [\gamma t - (\Delta T_{\text{Lim}} - \Delta T_0)] \quad (\text{A5})$$

and which at  $t = 0$  gives:

$$\frac{d\Delta T}{dt} \Big|_{t=0} = \beta = \gamma + \mu_0(\Delta T_{\text{Lim}} - \Delta T_0). \quad (\text{A6})$$

10 The second derivative is found by differentiating Eq. (A5) with respect to  $t$ , giving:

$$\begin{aligned} \frac{d^2 \Delta T}{dt^2} &= -(-e^{-(\mu_0 + \mu_1 t)t} \times [-\mu_0 - 2\mu_1 t]) [\gamma] - \left[-e^{-(\mu_0 + \mu_1 t)t} \times [-\mu_0 - 2\mu_1 t]\right] [\gamma] \\ &\quad - \left[-e^{-(\mu_0 + \mu_1 t)t} \times (-\mu_0 - 2\mu_1 t) \times (-\mu_0 - 2\mu_1 t) - e^{-(\mu_0 + \mu_1 t)t} \times -2\mu_1\right] \times [\gamma t - (\Delta T_{\text{Lim}} - \Delta T_0)] \\ &= (-2[\mu_0 + 2\mu_1 t]\gamma + [(-\mu_0 - 2\mu_1 t)^2 - 2\mu_1][\gamma t - (\Delta T_{\text{Lim}} - \Delta T_0)]) \times e^{-(\mu_0 + \mu_1 t)t}. \end{aligned}$$

At time  $t = 0$ , this gives:

$$15 \quad \frac{d^2 \Delta T}{dt^2} \Big|_{t=0} = -2\mu_0\gamma - [\mu_0^2 - 2\mu_1](\Delta T_{\text{Lim}} - \Delta T_0). \quad (\text{A7})$$

## Appendix B: Additional figures

Figure A1 repeats Fig. 5, but showing the fit of curves and related parameters ( $\Delta T_{\text{Lim}}$ ,  $\mu_0$ ,  $\mu_1$ ,  $\beta$  and  $\Delta T_0$ ) for 25 ESM simulations under rcp2.6 scenario. For these future fits, there is some interplay between parameter values that can achieve a good fit. The values fitted were constrained such that in all cases,  $0.0 \leq \Delta T_{\text{Lim}} \leq 4.0$  °C,  $-0.02 \leq \mu_0 \leq 0.08$  yr<sup>-1</sup> and

20  $0.0 \leq \mu_1 \leq 0.0006$  yr<sup>-2</sup>. A visual scan suggests a generally good fit for all ESMs except the GFDL\_CM3 model.

Figure A2 shows the dependence of time to convergence and any overshoot amount on  $\mu_0$  and  $\mu_1$ , whilst converging to 2.0 °C of global warming. The recent rate of warming is set to  $\beta = 0.025$  °C yr<sup>-1</sup>. Figure A3 is also for this higher  $\beta$  value, and converging to 1.5 °C of global warming.

*Author contributions.* CH created the mathematical profiles and designed the paper. All authors helped discuss expected requirements of the curves for research in to differences between achieving the 1.5 °C and 2.0 °C target. All authors made suggestions as to diagram format and aided in writing the paper.

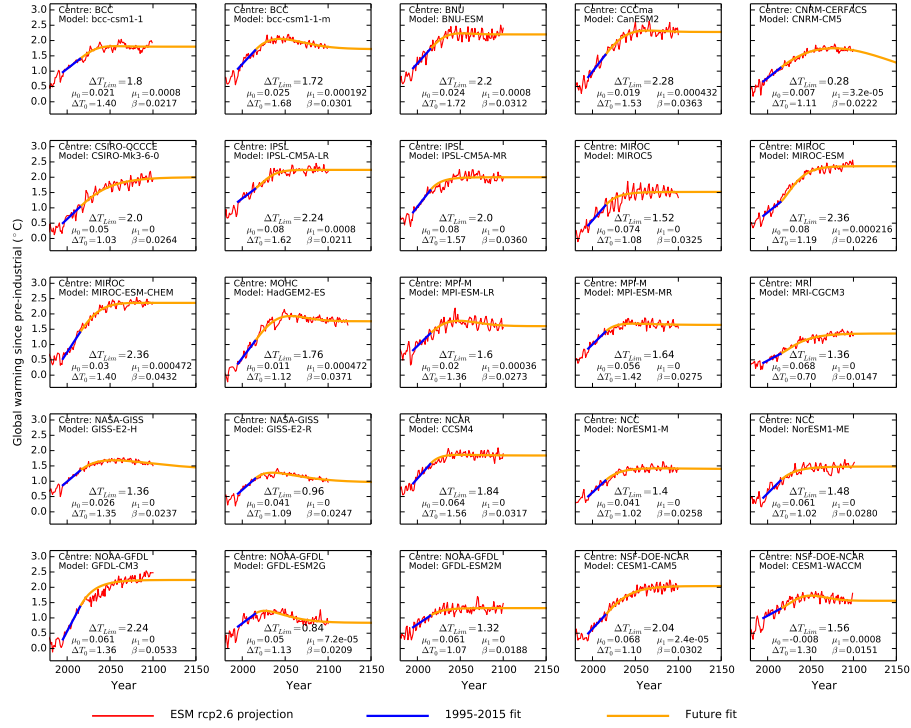

**Figure A1.** Identical to Fig. 5 except showing fitted curves for a larger set of 25 ESMs. Annotated in each panel is modelling centre, ESM name and values of  $\Delta T_{Lim}$  (°C),  $\mu_0$  (yr<sup>-1</sup>),  $\mu_1$  (yr<sup>-2</sup>),  $\Delta T_0$  (°C) and  $\beta$  (°C yr<sup>-1</sup>)

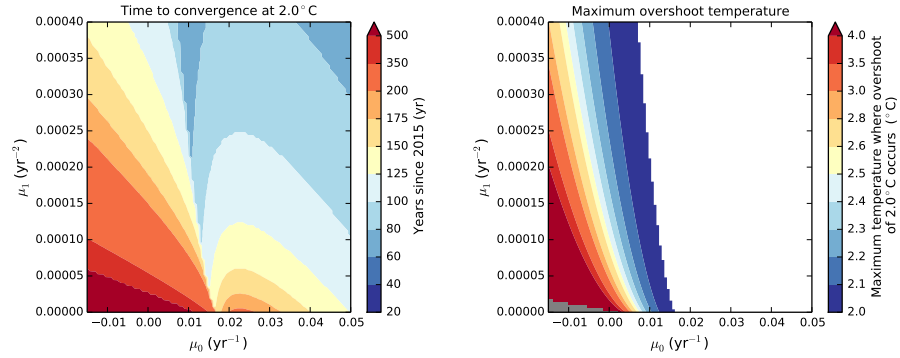

**Figure A2.** Identical to Fig. 3 but with  $\beta = 0.025$  °C yr<sup>-1</sup>.

*Competing interests.* The authors confirm they have no competing interests.

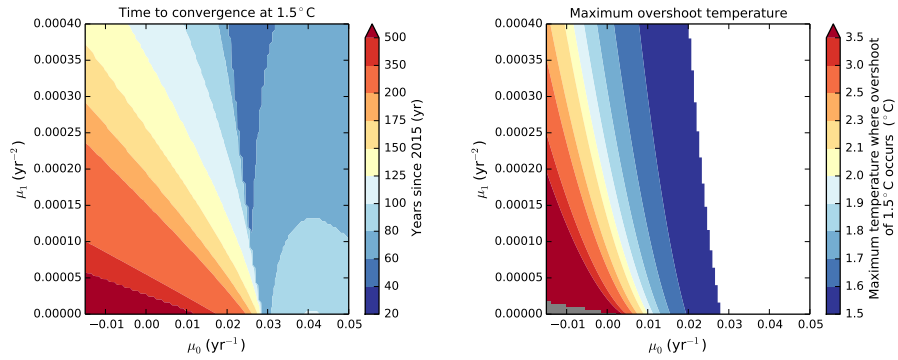

**Figure A3.** Identical to Fig. 4 but with  $\beta = 0.025$  °C yr<sup>-1</sup>.

*Acknowledgements.* C.H. acknowledges the NERC National Capability Fund. All authors (except SMS) received support from the U.K. Natural Environmental Research Council program "Understanding the Pathways to and Impacts of a 1.5 °C Rise in Global Temperature", through specific projects NE/P014909/1, NE/P014941/1 and NE/P015050/1. We acknowledge the World Climate Research Programme's Working Group on Coupled Modelling, which is responsible for CMIP, and we thank the climate modelling groups for producing and making available their model output.
